# Supplementary material
Source: publisher site journal article supplement (https://www.dovepress.com/article/551496)
Supplement: Supplementary file 1 [file 551496%20Revised%20%252509Supplementary.docx]

**Supplementary Material for**

**Detailed in silico evaluation of WNV proteins: dynamic and thermodynamic insights into doravirine as a potential multitarget agent**

Antonio Curcio1

Carlo Torti2

Eugenia Quiros-Roldan3

Stefano Alcaro1

Anna Artese1

1Department of Health Sciences, University Magna Græcia, 88100 Catanzaro, Italy; 2Infectious Diseases Unit, Fondazione Policlinico Universitario A. Gemelli IRCCS, Catholic University of the Sacred Heart, Rome, Italy; 3Department of Clinical and Experimental Sciences, Unit of Infectious and Tropical Diseases University of Brescia and ASST Spedali Civili di Brescia, Brescia, Italy.

Correspondence: Anna Artese

Email: [artese@unicz.it](mailto:artese@unicz.it)

**Table S1.** SiteScore, druggability score, and pocket size (in Å³) for C-terminal tunnel and N-terminal hydrophobic pocket of the core protein, as calculated by SiteMap.

**Table S2.** Best G-Score values, reported in kcal/mol, of remdesivir, rilpivirine, and doravirine for C-terminal tunnel and N-terminal hydrophobic pocket of the core protein.

**Figure S1.** Protein–ligand interactions between the three antivirals (remdesivir, rilpivirine, and doravirine) and C-terminal tunnel and N-terminal hydrophobic pocket of the core protein. Only interactions occurring for more than 30% of the 500 ns simulation time are displayed. Hydrogen bonds are depicted as purple dashed lines and arrows, π–π interactions as green lines, and cation–π interactions as red lines.

**Figure S2**. Alignment between the initial docking poses and the most representative ligand conformations obtained from MD clustering. For each complex, the five most populated clusters (covering more than 50% of the total conformational ensemble) are shown, highlighting the overall preservation of the ligand binding mode during the simulations.

**Table S3.** Best G-Score values, reported in kcal/mol, of remdesivir, rilpivirine, and doravirine for proteolytic site of NS3.

**Table S4**. SiteScore, druggability score, and pocket size (in Å³) for Motif A/C of RdRp NS5, as calculated by SiteMap.

**Table S5.** Best G-Score values, reported in kcal/mol, of remdesivir, rilpivirine, and doravirine for Motif A/C of RdRp NS5.

**Figure S3.** Protein–ligand interactions between the three antivirals (remdesivir, rilpivirine, and doravirine) and Motif A/C of RdRp NS5. Only interactions occurring for more than 30% of the 500 ns simulation time are displayed. Hydrogen bonds are depicted as purple dashed lines and arrows, π–π interactions as green lines, and cation–π interactions as red lines.

**Table S6**. SiteScore, druggability score, and pocket size (in Å³) for KDKE Motif of MTase NS5, as calculated by SiteMap.

**Table S7.** Best G-Score values, reported in kcal/mol, of remdesivir, rilpivirine, and doravirine for SAH site and KDKE Motif of MTase NS5.

**Figure S4.** Protein–ligand interactions between the three antivirals (remdesivir, rilpivirine, and doravirine) and SAH site and KDKE Motif of MTase NS5. Only interactions occurring for more than 30% of the 500 ns simulation time are displayed. Hydrogen bonds are depicted as purple dashed lines and arrows, π–π interactions as green lines, and cation–π interactions as red lines.

**Table S1.** SiteScore, druggability score, and pocket size (in Å³) for C-terminal tunnel and N-terminal hydrophobic pocket of the core protein, as calculated by SiteMap.

|  | **Core protein** | |
| --- | --- | --- |
|  | **C-terminal tunnel** | **N-terminal pocket** |
| **SiteScore** | 0.843 | 1,277 |
| **DScore** | 0.826 | 1.403 |
| **Size** | 39 Å³ | 120 Å³ |

**Table S2.** Best G-Score values, reported in kcal/mol, of remdesivir, rilpivirine, and doravirine for C-terminal tunnel and N-terminal hydrophobic pocket of the core protein.

|  | **XP G-Score (kcal/mol)** | |
| --- | --- | --- |
|  | **C-terminal tunnel** | **N-terminal pocket** |
| **Remdesivir (RDV)** | -3.45 | -3.40 |
| **Rilpivirine (RPV)** | -5.67 | -2.87 |
| **Doravirine (DOR)** | -5.42 | -3.63 |


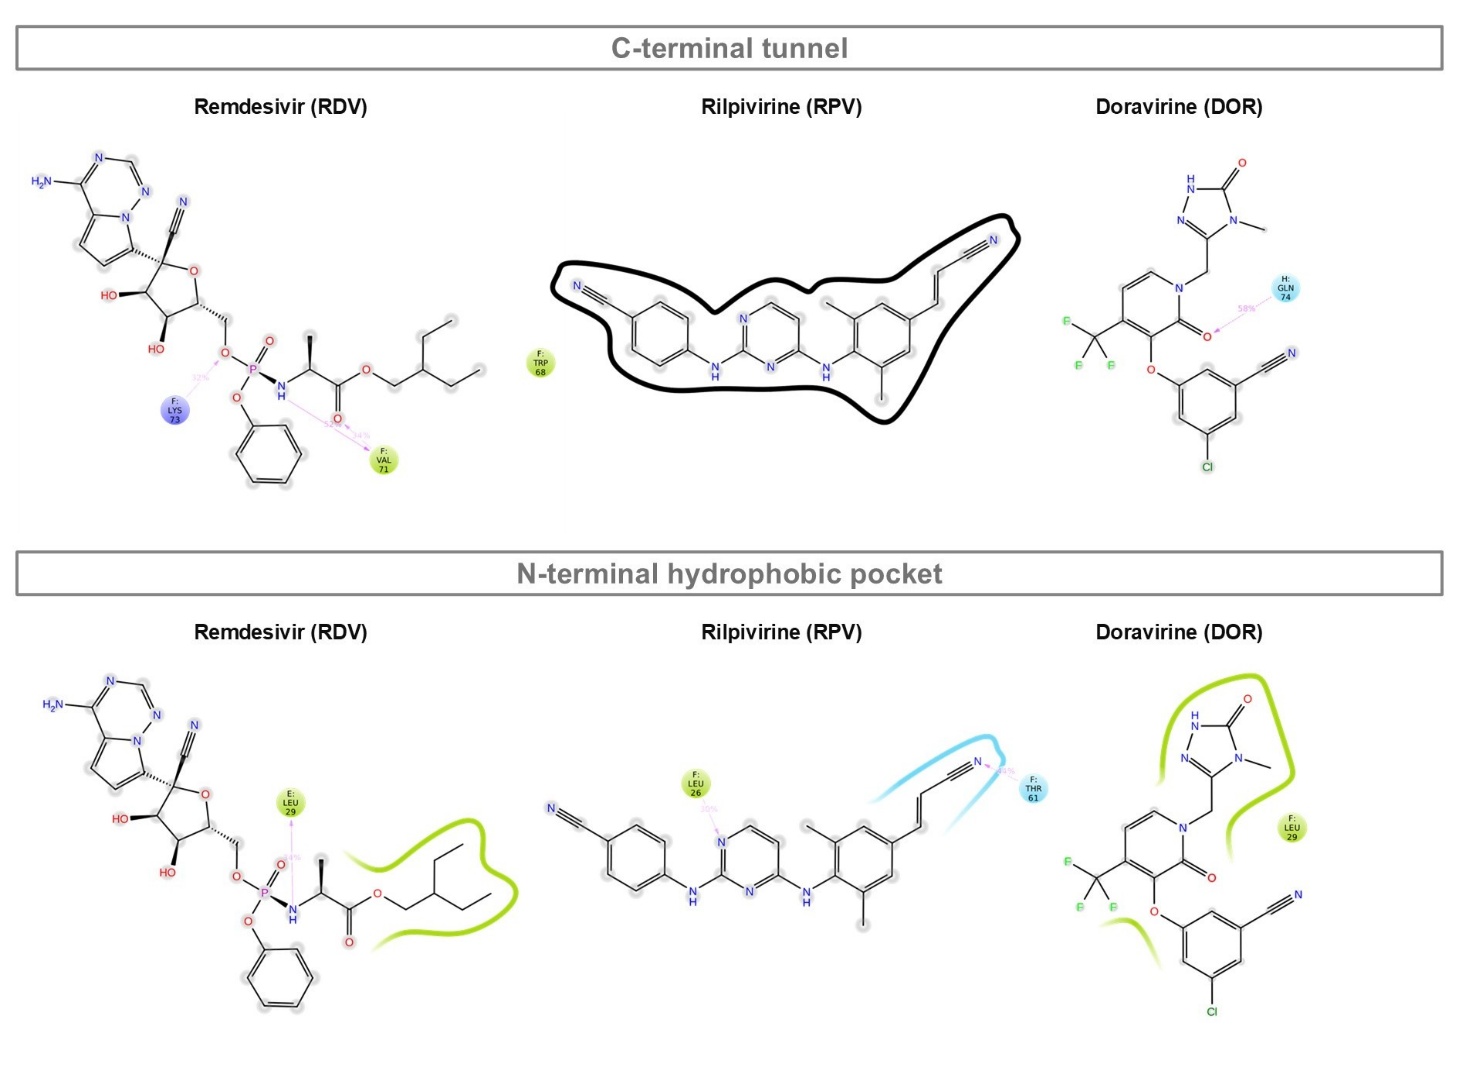


**Figure S1.** Protein–ligand interactions between the three antivirals (remdesivir, rilpivirine, and doravirine) and C-terminal tunnel and N-terminal hydrophobic pocket of the core protein. Only interactions occurring for more than 30% of the 500 ns simulation time are displayed. Hydrogen bonds are depicted as purple dashed lines and arrows, π–π interactions as green lines, and cation–π interactions as red lines.


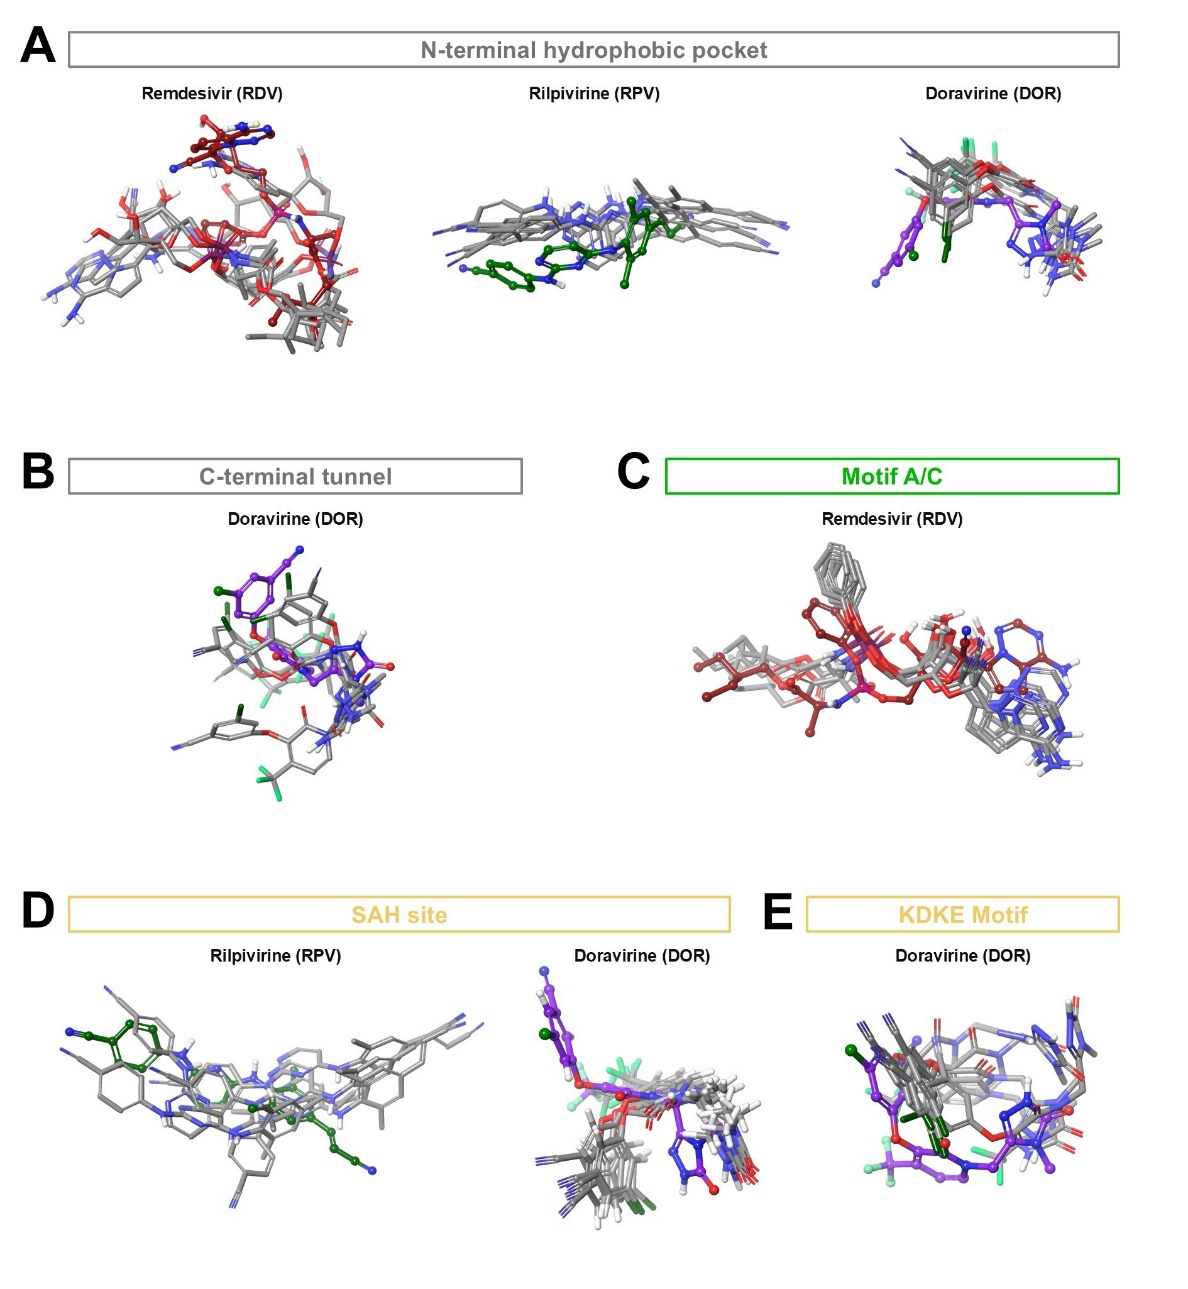


**Figure S2**. Alignment between the initial docking poses and the most representative ligand conformations obtained from MD clustering. For each complex, the five most populated clusters (covering more than 50% of the total conformational ensemble) are shown, highlighting the overall preservation of the ligand binding mode during the simulations.

**Table S3.** Best G-Score values, reported in kcal/mol, of remdesivir, rilpivirine, and doravirine for proteolytic site of NS3.

|  | **XP G-Score (kcal/mol)** |
| --- | --- |
|  | **Proteolytic site** |
| **Remdesivir (RDV)** | -7.37 |
| **Rilpivirine (RPV)** | -5.54 |
| **Doravirine (DOR)** | -4.26 |

**Table S4.** SiteScore, druggability score, and pocket size (in Å³) for Motif A/C of RdRp NS5, as calculated by SiteMap.

|  | **RdRp NS5** |
| --- | --- |
|  | **Motif A/C** |
| **SiteScore** | 0.999 |
| **DScore** | 0.993 |
| **Size** | 193 Å³ |

**Table S5.** Best G-Score values, reported in kcal/mol, of remdesivir, rilpivirine, and doravirine for Motif A/C of RdRp NS5.

|  | **XP G-Score (kcal/mol)** |
| --- | --- |
|  | **Motif A/C** |
| **Remdesivir (RDV)** | -9.59 |
| **Rilpivirine (RPV)** | -6.19 |
| **Doravirine (DOR)** | -5.56 |


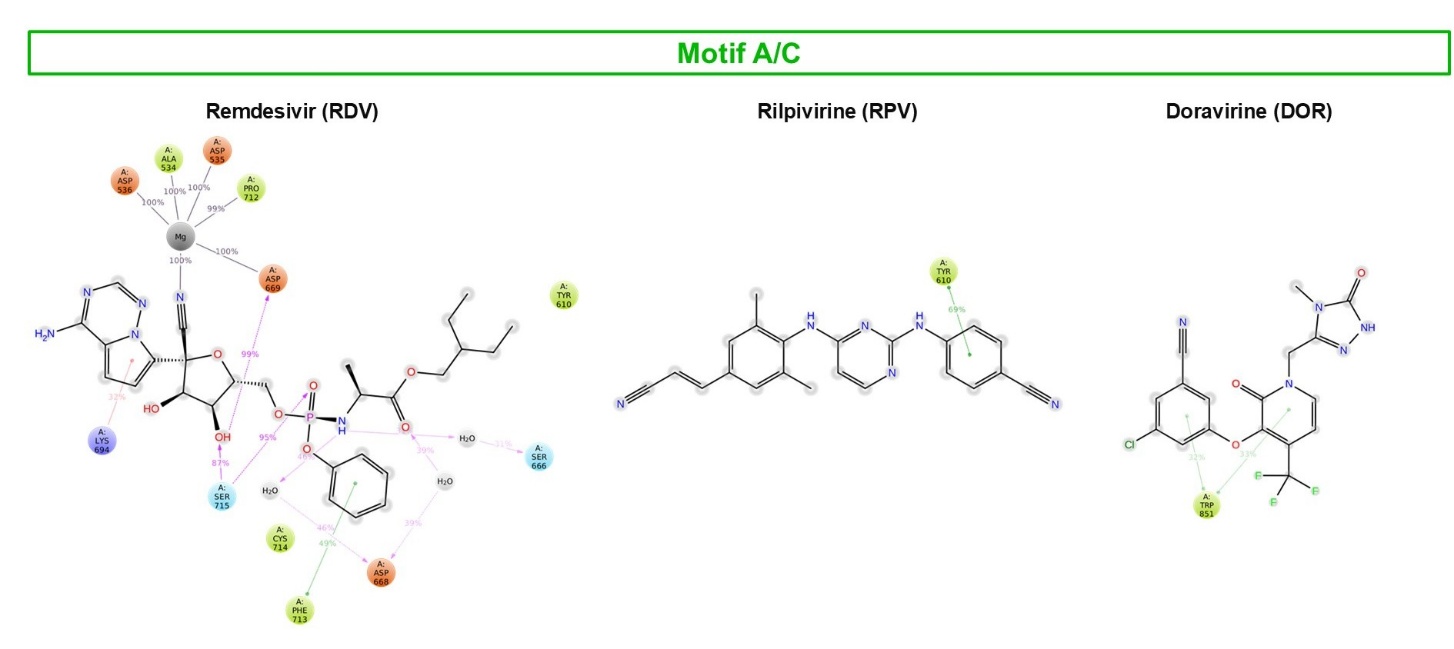


**Figure S3.** Protein–ligand interactions between the three antivirals (remdesivir, rilpivirine, and doravirine) and Motif A/C of RdRp NS5. Only interactions occurring for more than 30% of the 500 ns simulation time are displayed. Hydrogen bonds are depicted as purple dashed lines and arrows, π–π interactions as green lines, and cation–π interactions as red lines.

**Table S6.** SiteScore, druggability score, and pocket size (in Å³) for KDKE Motif of MTase NS5, as calculated by SiteMap.

|  | **MTase NS5** |
| --- | --- |
|  | **KDKE Motif** |
| **SiteScore** | 1.017 |
| **DScore** | 0.963 |
| **Size** | 119 Å³ |

**Table S7.** Best G-Score values, reported in kcal/mol, of remdesivir, rilpivirine, and doravirine for SAH site and KDKE Motif of MTase NS5.

|  | **XP G-Score (kcal/mol)** | |
| --- | --- | --- |
|  | **SAH site** | **KDKE Motif** |
| **Remdesivir (RDV)** | 2.27 | -4.88 |
| **Rilpivirine (RPV)** | -3.80 | -1.03 |
| **Doravirine (DOR)** | -1.56 | -3.04 |


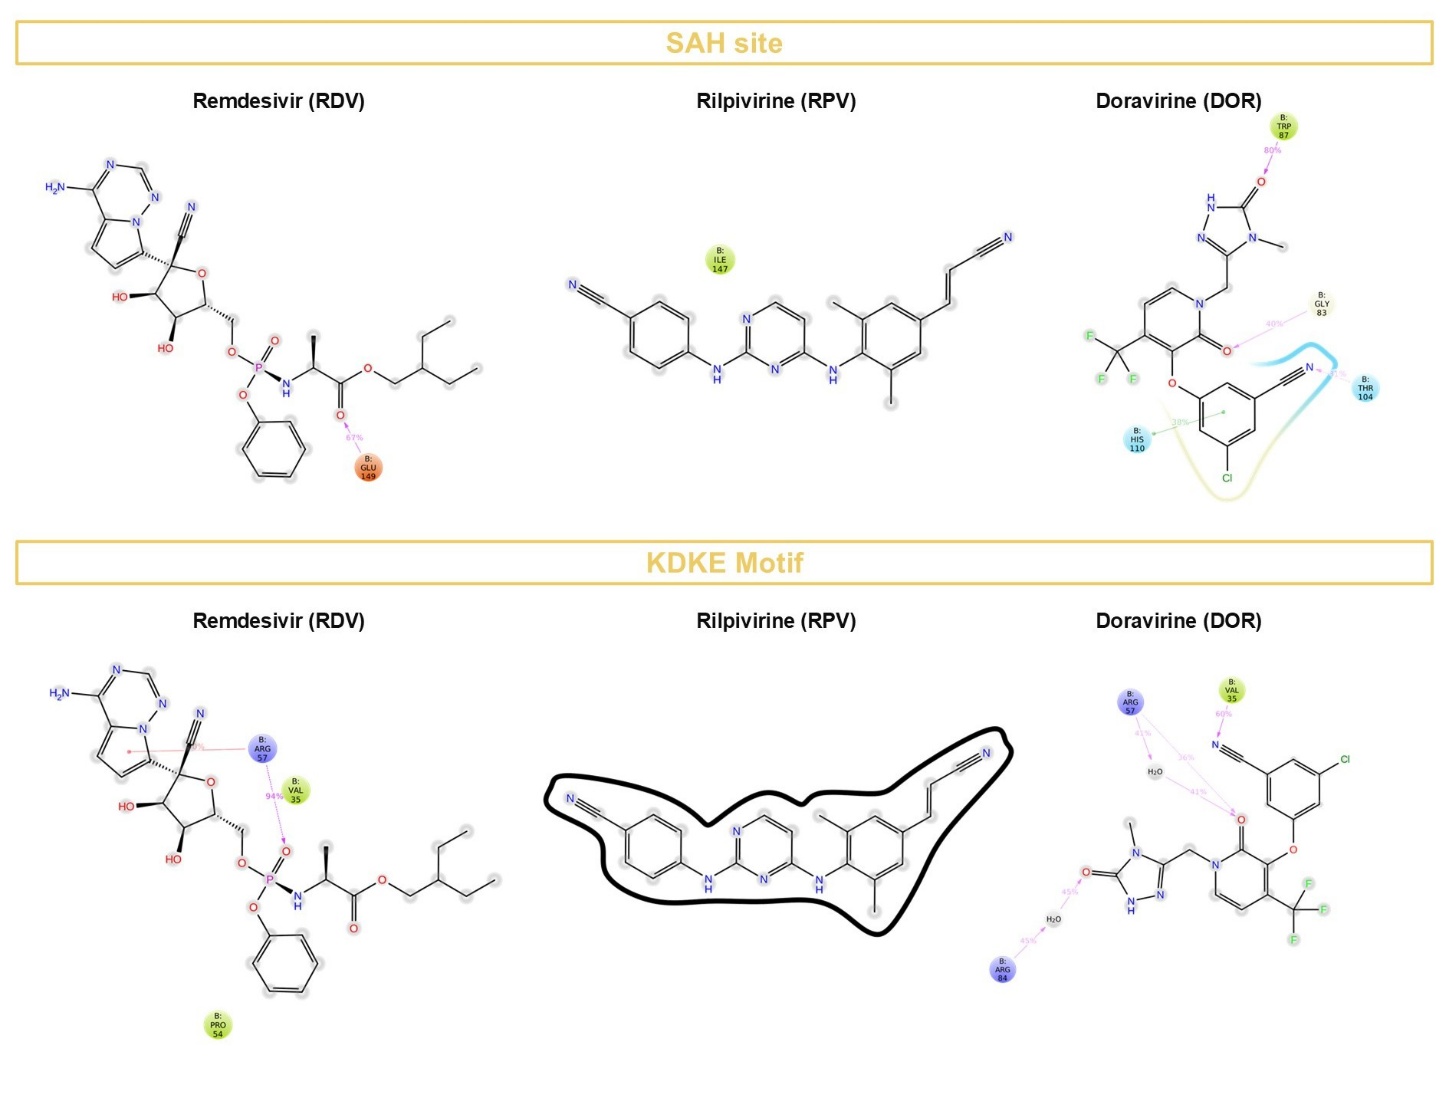


**Figure S4.** Protein–ligand interactions between the three antivirals (remdesivir, rilpivirine, and doravirine) and SAH site and KDKE Motif of MTase NS5. Only interactions occurring for more than 30% of the 500 ns simulation time are displayed. Hydrogen bonds are depicted as purple dashed lines and arrows, π–π interactions as green lines, and cation–π interactions as red lines.
